# Supplementary material for: The New SH3b_T Domain Increases the Structural and Functional Variability Among SH3b-Like CBDs from Staphylococcal Phage Endolysins
Source: Springer Nature journal article supplement (doi:10.1007/s12602-024-10309-0), 2024-07-30
Supplement: MOESM1 [file 12602_2024_10309_MOESM1_ESM-5.pdf]

Online Resource 1 from:

## The new *SH3b\_T* domain increases the structural and functional variability among SH3b-like CBDs from staphylococcal phage endolysins

Roberto Vázquez\*, Diana Gutiérrez\*, Dennis Grimon, Lucía Fernández, Pilar García, Ana Rodríguez, Yves Briers#

# Author to whom correspondence should be addressed (yves.briers@ugent.be)

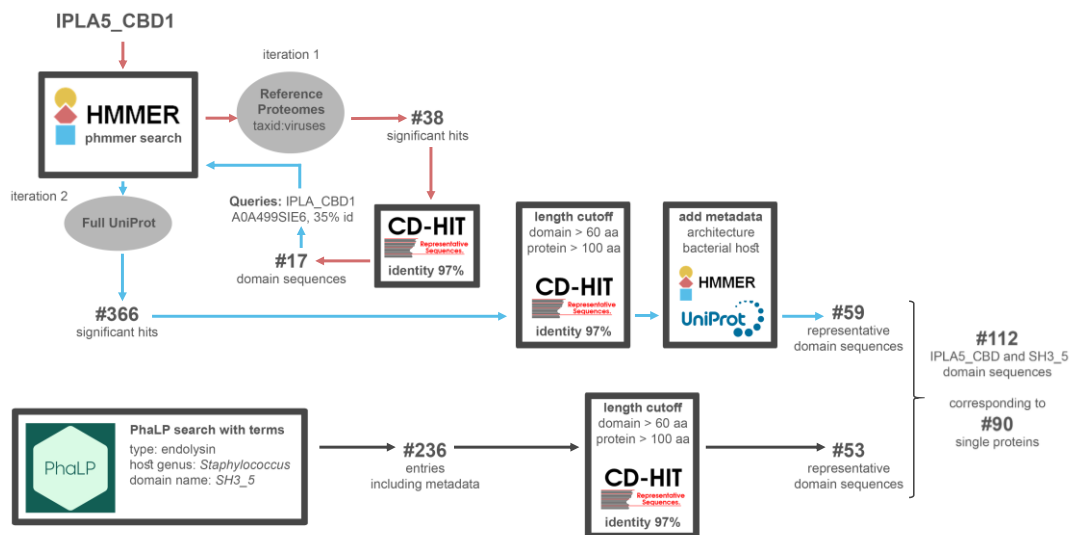

Supplementary Fig. S1. Workflow for constructing the datasets of SH3b-like sequences.

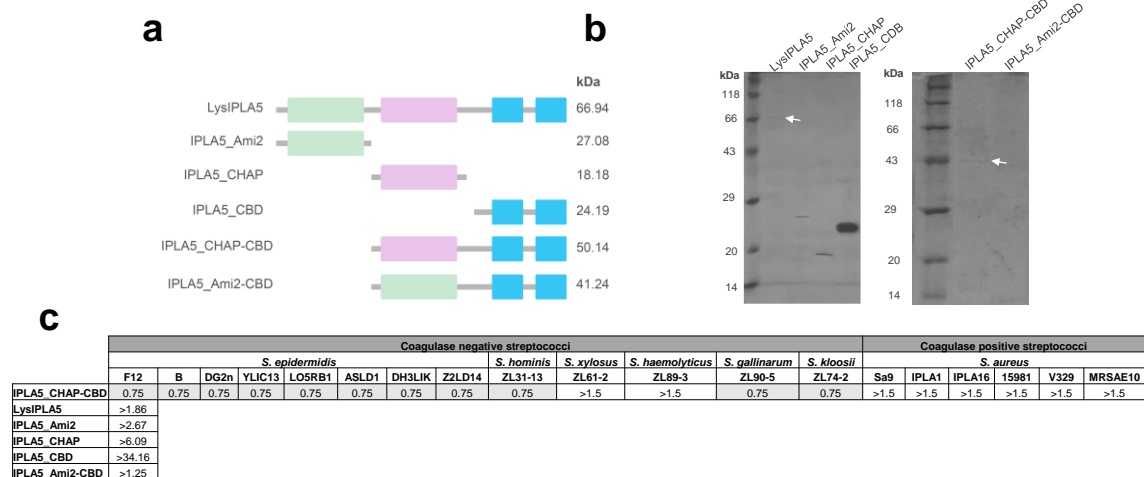

**Supplementary Fig. S2.** Functional dissection of LysIPLA5 domains. (a) Scheme of the proteins tested in this experiment. (b) SDS-PAGE depicting the proteins after purification. (c) MIC values calculated for each protein.

**Supplementary Table S1.** Absolute MIC values ( $\mu\text{M}$ ) for the proteins and strains shown in Fig. 4.

| Strain                        | RODI_CHAP | RODI_CHAP-CBD | RODI_CHAP-IPLA5_CBD | C1C_CHAP | C1C_CHAP-CBD | C1C_CHAP-IPLA5_CBD |
|-------------------------------|-----------|---------------|---------------------|----------|--------------|--------------------|
| <i>S. epidermidis</i> F12     | 6         | 1.5           | 0.1875              | 3        | 0.375        | 0.1875             |
| <i>S. epidermidis</i> B       | 6         | 6             | 0.1875              | 3        | 0.375        | 0.1875             |
| <i>S. epidermidis</i> DG2n    | 6         | 6             | 0.1875              | 3        | 0.375        | 0.09375            |
| <i>S. epidermidis</i> YLIC13  | 12        | 6             | 0.1875              | 3        | 0.375        | 0.1875             |
| <i>S. epidermidis</i> LO5RB1  | 3         | 3             | 0.09375             | 3        | 0.0468       | 0.023438           |
| <i>S. epidermidis</i> ASLD1   | 3         | 6             | 0.1875              | 6        | 0.375        | 0.1875             |
| <i>S. epidermidis</i> DH3LIK  | 6         | 3             | 0.1875              | 3        | 0.375        | 0.1875             |
| <i>S. epidermidis</i> Z2LD14  | 6         | 3             | 0.1875              | 3        | 0.375        | 0.09375            |
| <i>S. hominis</i> ZL31-13     | 1.5       | 3             | 0.1875              | 1.5      | 0.09375      | 0.09375            |
| <i>S. xylosum</i> ZL61-2      | 6         | 6             | 3                   | 3        | 1.5          | 1.5                |
| <i>S. haemolyticus</i> ZL89-3 | 3         | 6             | 3                   | 3        | 1.5          | 1.5                |
| <i>S. gallinarum</i> ZL90-5   | 3         | 1.5           | 1.5                 | 6        | 1.5          | 0.75               |
| <i>S. kloosii</i> ZL74-2      | 3         | 1.5           | 1.5                 | 3        | 1.5          | 0.75               |
| <i>S. aureus</i> Sa9          | 3         | 0.375         | 3                   | 3        | 1.5          | 1.5                |
| <i>S. aureus</i> IPLA1        | 1.5       | 1.5           | 1.5                 | 6        | 1.5          | 1.5                |
| <i>S. aureus</i> IPLA16       | 3         | 1.5           | 1.5                 | 6        | 1.5          | 1.5                |
| <i>S. aureus</i> 15981        | 3         | 1.5           | 1.5                 | 6        | 1.5          | 1.5                |
| <i>S. aureus</i> V329         | 3         | 1.5           | 1.5                 | 3        | 1.5          | 1.5                |
| <i>S. aureus</i> MRSAE10      | 3         | 3             | 1.5                 | 3        | 3            | 1.5                |
